# Supplementary material for: JAK‐STAT core cancer pathway: An integrative cancer interactome analysis
Source: PubMed Central journal article supplement (PMC8980946; doi:10.1111/jcmm.17228), 2022-03-01
Supplement: JCMM-26-2049-s001.pdf [file JCMM-26-2049-s001.pdf]

| STAT UniProt | PPI UniProt ID | STAT  | PPIs   | Pubmed IDs                                                                                                                       |
|--------------|----------------|-------|--------|----------------------------------------------------------------------------------------------------------------------------------|
| P42224       | Q00597         | STAT1 | FANCC  | 10848598;11520787;14499622;21836163;25402006                                                                                     |
| P42224       | Q8TDB6         | STAT1 | DTX3L  | 24886089;26479788                                                                                                                |
| P42224       | Q7Z434         | STAT1 | MAVS   | 21903422                                                                                                                         |
| P42224       | P52294         | STAT1 | KPNA1  | 10964507;12048190;12740372;16298512;21836163;25402006                                                                            |
| P42224       | Q8N9N8         | STAT1 | EIF1AD | 16189514;25416956                                                                                                                |
| P42224       | Q02156         | STAT1 | PRKCE  | 20353823;24825907;25402006                                                                                                       |
| P42224       | Q6UWB1         | STAT1 | IL27RA | 12734330;21836163                                                                                                                |
| P42224       | Q92793         | STAT1 | CREBBP | 10848577;15695802;15894584;16481475;19915063;25402006;25451029                                                                   |
| P42224       | Q9UIS9         | STAT1 | MBD1   | 19074829;25402006                                                                                                                |
| P42224       | Q13547         | STAT1 | HDAC1  | 14645718;16481475;25402006                                                                                                       |
| P42224       | Q13263         | STAT1 | TRIM28 | 18037959;18381204                                                                                                                |
| P42224       | Q01804         | STAT1 | OTUD4  | 25416956                                                                                                                         |
| P42224       | P42345         | STAT1 | MTOR   | 12807916;19553685;25241761;25402006                                                                                              |
| P42224       | Q05397         | STAT1 | PTK2   | 11278462;20576130;25241761;25402006;doi:10.1007/978-3-540-73060-                                                                 |
| P42224       | Q9Y566         | STAT1 | SHANK1 | 20936779                                                                                                                         |
| P42224       | Q04206         | STAT1 | RELA   | 16481475;23023127;25241761;25402006                                                                                              |
| P42224       | Q00978         | STAT1 | IRF9   | 16082366;17923090;24065129;25402006;8943351;9242679;doi:10.1007/                                                                 |
| P42224       | Q06124         | STAT1 | PTPN11 | 12270932;18832710;21836163;25402006;27229929                                                                                     |
| P42224       | Q05655         | STAT1 | PRKCD  | 11839738;11972023;12637327;12807916;12817007;14963018;15322115<br>;19553685;21836163;25402006;7543024;7690989;9355737            |
| P42224       | Q13813         | STAT1 | SPTAN1 | 20936779;25402006                                                                                                                |
| P42224       | Q14203         | STAT1 | DCTN1  | 20936779                                                                                                                         |
| P42224       | P63244         | STAT1 | RACK1  | 11301323;12960323;25402006;doi:10.1007/978-3-540-73060-6_4                                                                       |
| P42224       | P63279         | STAT1 | UBE2I  | 12356736;12764129;14517261;25402006                                                                                              |
| P42224       | Q9UFF9         | STAT1 | CNOT8  | 23386060                                                                                                                         |
| P42224       | Q09472         | STAT1 | EP300  | 10464260;11134049;11923478;12403783;15824515;18566411;19915063<br>;25402006;26479788;26504087;8986769;9843502;doi:10.1007/978-3- |
| P42224       | P78318         | STAT1 | IGBP1  | 19553685;20936779                                                                                                                |
| P42224       | Q16531         | STAT1 | DDB1   | 21988832                                                                                                                         |
| P42224       | Q99873         | STAT1 | PRMT1  | 11257227;12171910;21836163;25402006                                                                                              |
| P42224       | Q01082         | STAT1 | SPTBN1 | 20936779                                                                                                                         |
| P42224       | Q9UIV1         | STAT1 | CNOT7  | 23386060                                                                                                                         |
| P42224       | Q15257         | STAT1 | PTPA   | 19553685                                                                                                                         |

|        |        |       |          |                                                                                                                                     |
|--------|--------|-------|----------|-------------------------------------------------------------------------------------------------------------------------------------|
| P42224 | Q9Y4C1 | STAT1 | KDM3A    | 25535969                                                                                                                            |
| P42224 | P42229 | STAT1 | STAT5A   | 10358045;16082366;21836163;23023127;25241761;25402006;doi:10.10                                                                     |
| P42224 | Q9BZS1 | STAT1 | FOXP3    | 19124747                                                                                                                            |
| P42224 | P55318 | STAT1 | FOXA3    | 25609649                                                                                                                            |
| P42224 | Q01094 | STAT1 | E2F1     | 20195357;25402006                                                                                                                   |
| P42224 | P59826 | STAT1 | BPIFB3   | 17353931                                                                                                                            |
| P42224 | P52630 | STAT1 | STAT2    | 10446176;10490982;12048190;14722125;15825084;15978943;16082366<br>;17923090;21178011;21268015;21836163;23023127;24065129;2540200    |
| P42224 | Q15628 | STAT1 | TRADD    | 10848577;21836163;doi:10.1007/978-3-540-73060-6_4                                                                                   |
| P42224 | P42224 | STAT1 | STAT1    | 12923054;14704793;15284440;15780933;16007122;18591661;21914072                                                                      |
| P42224 | P48551 | STAT1 | IFNAR2   | 11301323;21836163;25402006;9121453;doi:10.1007/978-3-540-73060-                                                                     |
| P42224 | Q8TEK3 | STAT1 | DOT1L    | 22002246                                                                                                                            |
| P42224 | P51532 | STAT1 | SMARCA4  | 16195385;20353823;21079652;25402006                                                                                                 |
| P42224 | P22607 | STAT1 | FGFR3    | 10918587;11294897;11839738;12637327;12817007;15322115;21836163                                                                      |
| P42224 | P11277 | STAT1 | SPTB     | 25814554                                                                                                                            |
| P42224 | O15379 | STAT1 | HDAC3    | 16481475;25402006                                                                                                                   |
| P42224 | P06239 | STAT1 | LCK      | 10918587;11294897;11839738;12637327;12817007;15322115;25402006<br>;7543024;7657660;7690989;doi:10.1007/978-3-540-73060-6_4          |
| P42224 | P37231 | STAT1 | PPARG    | 25402006;26504087                                                                                                                   |
| P42224 | P25791 | STAT1 | LMO2     | 16189514;25416956                                                                                                                   |
| P42224 | P33992 | STAT1 | MCM5     | 11248027;25402006;9843502;doi:10.1007/978-3-540-73060-6_4                                                                           |
| P42224 | P29597 | STAT1 | TYK2     | 10918587;11294897;11839738;12637327;12817007;12960323;15322115<br>;21836163;25402006;7543024;7657660;7690989;doi:10.1007/978-3-540- |
| P42224 | P18847 | STAT1 | ATF3     | 19647793;25402006                                                                                                                   |
| P42224 | P01100 | STAT1 | FOS      | 12788789;21836163;25241761;25402006;8662591                                                                                         |
| P42224 | O14980 | STAT1 | XPO1     | 22833565;25402006;26673895;9205132;doi:10.1007/978-3-540-73060-                                                                     |
| P42224 | P12931 | STAT1 | SRC      | 10358079;14978237;21836163;25402006;9344858                                                                                         |
| P42224 | P22455 | STAT1 | FGFR4    | 10918587;11294897;11839738;12637327;12817007;15322115;25402006<br>;7543024;7657660;7690989;doi:10.1007/978-3-540-73060-6_4          |
| P42224 | O43707 | STAT1 | ACTN4    | 20936779                                                                                                                            |
| P42224 | P05161 | STAT1 | ISG15    | 16009940;16139798;25402006                                                                                                          |
| P42224 | P09619 | STAT1 | PDGFRB   | 23023127;23397142;25402006;8549654;9484840                                                                                          |
| P42224 | P08238 | STAT1 | HSP90AB1 | 20936779                                                                                                                            |
| P42224 | P04626 | STAT1 | ERBB2    | 16273093;25241761;25402006                                                                                                          |

|        |        |       |         |                                                                                                                                                                                                    |
|--------|--------|-------|---------|----------------------------------------------------------------------------------------------------------------------------------------------------------------------------------------------------|
| P42224 | P10276 | STAT1 | RARA    | 25303530<br>10918587;10982844;11294897;11722592;11839738;12637327;12817007                                                                                                                         |
| P42224 | P23458 | STAT1 | JAK1    | ;14978237;15284024;15322115;15978943;25402006;7543024;7657660;7                                                                                                                                    |
| P42224 | P19793 | STAT1 | RXRA    | 21988832;25402006                                                                                                                                                                                  |
| P42224 | P11473 | STAT1 | VDR     | 11909970;25402006;doi:10.1007/978-3-540-73060-6_4                                                                                                                                                  |
| P42224 | P29590 | STAT1 | PML     | 25402006;25733689;25812002                                                                                                                                                                         |
| P42224 | P10721 | STAT1 | KIT     | 10358045;25241761;25402006;9355737                                                                                                                                                                 |
| P42224 | P14136 | STAT1 | GFAP    | 20936779                                                                                                                                                                                           |
| P42224 | P19525 | STAT1 | EIF2AK2 | 11278865;21836163;25402006;9135145;doi:10.1007/978-3-540-73060-                                                                                                                                    |
| P42224 | P04637 | STAT1 | TP53    | 14602726;15217838;17346710;17992189;23023127;25402006<br>10918587;11152457;11294897;11839738;12637327;12817007;14978237                                                                            |
| P42224 | O60674 | STAT1 | JAK2    | ;15284024;15322115;16082366;19834108;20353823;21836163;2425595                                                                                                                                     |
| P42224 | P35968 | STAT1 | KDR     | 10961983;15703780;25402006                                                                                                                                                                         |
| P42224 | O75925 | STAT1 | PIAS1   | 10805787;11257227;12171910;12855578;16082366;17371985;18566411<br>;19136629;21836163;25241761;25402006;9724754;doi:10.1007/978-3-                                                                  |
| P42224 | P32121 | STAT1 | ARRB2   | 17620599                                                                                                                                                                                           |
| P42224 | P10914 | STAT1 | IRF1    | 10764778;16082366;16512786;17525742;19124747;24012417;25402006                                                                                                                                     |
| P42224 | P17706 | STAT1 | PTPN2   | 12171910;12923054;19171783;21836163;25402006;doi:10.1007/978-3-                                                                                                                                    |
| P42224 | P00533 | STAT1 | EGFR    | 10358079;10918587;11294897;11839738;12070153;12637327;12817007<br>;15284024;15322115;16273093;21836163;23956138;24658140;2479726<br>10848598;15494521;15780933;21689637;21836163;25402006;7514165; |
| P42224 | P15260 | STAT1 | IFNGR1  | 8156998;8605876;8662591;8910398;doi:10.1007/978-3-540-73060-6_4                                                                                                                                    |
| P42224 | P16234 | STAT1 | PDGFRA  | 25241761;25402006;9484840                                                                                                                                                                          |
| P42224 | O15350 | STAT1 | TP73    | 17346710;25402006                                                                                                                                                                                  |
| P42224 | P38398 | STAT1 | BRCA1   | 10792030;25402006;doi:10.1007/978-3-540-73060-6_4                                                                                                                                                  |
| P52630 | Q92793 | STAT2 | CREBBP  | 10464260;25402006;28514442;8848048                                                                                                                                                                 |
| P52630 | Q8TEW6 | STAT2 | DOK4    | 25814554                                                                                                                                                                                           |
| P52630 | Q96ST2 | STAT2 | IWS1    | 21988832                                                                                                                                                                                           |
| P52630 | Q9Y234 | STAT2 | LIPT1   | 26186194;28514442                                                                                                                                                                                  |
| P52630 | Q13547 | STAT2 | HDAC1   | 14645718;25402006                                                                                                                                                                                  |
| P52630 | Q09472 | STAT2 | EP300   | 10464260;15154850;18678383;21836163;25402006;doi:10.1007/978-3-                                                                                                                                    |
| P52630 | Q00978 | STAT2 | IRF9    | 15978943;17923090;21178011;21268015;21836163;21903422;24065129<br>;25402006;28514442;8943351;9242679;doi:10.1007/978-3-540-73060-                                                                  |
| P52630 | P52630 | STAT2 | STAT2   | 8605877                                                                                                                                                                                            |

|        |        |       |                   |                                                                                                                                   |
|--------|--------|-------|-------------------|-----------------------------------------------------------------------------------------------------------------------------------|
| P52630 | O60244 | STAT2 | MED14             | 12509459                                                                                                                          |
| P52630 | P00533 | STAT2 | EGFR              | 24658140;25402006                                                                                                                 |
| P52630 | P17181 | STAT2 | IFNAR1            | 11786546;12220192;15356134;16082366;21836163;25402006;7559568;<br>8605876;9121453;9677371;doi:10.1007/978-3-540-73060-6_4         |
| P52630 | P10253 | STAT2 | GAA               | 21988832                                                                                                                          |
| P52630 | P51532 | STAT2 | SMARCA4           | 12244326;25402006                                                                                                                 |
| P52630 | P48551 | STAT2 | IFNAR2            | 11786546;12220192;17923090;18456457;21836163;25402006;9121453;                                                                    |
| P52630 | P49354 | STAT2 | FNTA              | 21988832                                                                                                                          |
| P40763 | Q92665 | STAT3 | MRPS31            | 21988832                                                                                                                          |
| P40763 | Q06520 | STAT3 | SULT2A1           | 21988832                                                                                                                          |
| P40763 | Q15170 | STAT3 | TCEAL1            | 26186194;28514442                                                                                                                 |
| P40763 | Q9NR55 | STAT3 | BATF3             | 25814554                                                                                                                          |
| P40763 | Q9NSI6 | STAT3 | BRWD1             | 25814554                                                                                                                          |
| P40763 | Q9Y5S9 | STAT3 | RBM8A             | 18503751;25402006                                                                                                                 |
| P40763 | Q8IZS5 | STAT3 | OFCC1             | 25814554                                                                                                                          |
| P40763 | P45983 | STAT3 | MAPK8             | 10446219;10521505;11350938;12576423;12763138;14551213;15979846<br>;21836163;25402006;9343414;9872331;doi:10.1007/978-3-540-73060- |
| P40763 | Q92769 | STAT3 | HDAC2             | 15653507;25241761;25402006                                                                                                        |
| P40763 | P78347 | STAT3 | GTF2I             | 25402006;9584171                                                                                                                  |
| P40763 | Q8IZL8 | STAT3 | PELP1             | 15994929;25402006                                                                                                                 |
| P40763 | Q86VH2 | STAT3 | KIF27             | 25609649                                                                                                                          |
| P40763 | Q9UBF1 | STAT3 | MAGEC2            | 27775077                                                                                                                          |
| P40763 | Q05655 | STAT3 | PRKCD             | 10446219;10521505;11335711;11350938;12576423;12763138;14551213                                                                    |
| P40763 | Q6NSI1 | STAT3 | ANKRD26P1         | 25609649                                                                                                                          |
| P40763 | Q96G01 | STAT3 | BICD1             | 21988832                                                                                                                          |
| P40763 | P51681 | STAT3 | CCR5              | 11350939;14674010;25402006                                                                                                        |
| P40763 | Q9BXM7 | STAT3 | PINK1             | 25814554                                                                                                                          |
| P40763 | Q9BVP2 | STAT3 | GNL3              | 21988832                                                                                                                          |
| P40763 | Q92569 | STAT3 | PIK3R3            | 25402006;25814554                                                                                                                 |
| P40763 | P51692 | STAT3 | STAT5B            | 16082366;21836163;23023127;25241761;25402006;9398404;doi:10.100                                                                   |
| P40763 | P43405 | STAT3 | SYK               | 10825200;20133729;21516116;25402006;25416956                                                                                      |
| P40763 | Q6ZVU3 | STAT3 | cDNA FLJ42079 fis | 25814554                                                                                                                          |
| P40763 | Q9Y4J8 | STAT3 | DTNA              | 25814554                                                                                                                          |
| P40763 | Q9NVE4 | STAT3 | CCDC87            | 25814554                                                                                                                          |

|        |        |       |            |                                                                                                                                    |
|--------|--------|-------|------------|------------------------------------------------------------------------------------------------------------------------------------|
| P40763 | P51451 | STAT3 | BLK        | 25402006;25416956                                                                                                                  |
| P40763 | Q8N988 | STAT3 | ZNF557     | 25814554                                                                                                                           |
| P40763 | Q13011 | STAT3 | ECH1       | 21988832                                                                                                                           |
| P40763 | P42224 | STAT3 | STAT1      | 11594781;11722592;12070153;15284024;16007122;16082366;21836163<br>;23023127;25241761;25402006;25609649;28514442;8662591;doi:10.100 |
| P40763 | P58753 | STAT3 | TIRAP      | 21903422                                                                                                                           |
| P40763 | Q92793 | STAT3 | CREBBP     | 11239394;15649887;15653507;25402006                                                                                                |
| P40763 | Q9Y698 | STAT3 | CACNG2     | 26186194;28514442                                                                                                                  |
| P40763 | Q6P1L5 | STAT3 | FAM117B    | 25814554                                                                                                                           |
| P40763 | Q6PD62 | STAT3 | CTR9       | 17911113                                                                                                                           |
| P40763 | Q5VWN6 | STAT3 | FAM208B    | 25814554                                                                                                                           |
| P40763 | P51532 | STAT3 | SMARCA4    | 15286705;25402006                                                                                                                  |
| P40763 | Q969D9 | STAT3 | TSLP       | 10570284;11418668                                                                                                                  |
| P40763 | P63244 | STAT3 | RACK1      | 16382134;25402006                                                                                                                  |
| P40763 | Q9UBX0 | STAT3 | HESX1      | 25814554                                                                                                                           |
| P40763 | Q7Z417 | STAT3 | NUFIP2     | 25814554                                                                                                                           |
| P40763 | Q00653 | STAT3 | NFKB2      | 16651533;25402006;25771405                                                                                                         |
| P40763 | Q03181 | STAT3 | PPARD      | 25402006;25814554                                                                                                                  |
| P40763 | Q86WK9 | STAT3 | PAQR7      | 25814554                                                                                                                           |
| P40763 | P42345 | STAT3 | MTOR       | 10660304;15522880;23329839;25402006;doi:10.1007/978-3-540-73060-                                                                   |
| P40763 | Q96KP4 | STAT3 | CNDP2      | 25814554                                                                                                                           |
| P40763 | Q8TAE8 | STAT3 | GADD45GIP1 | 18200042;25402006;25416956                                                                                                         |
| P40763 | P46781 | STAT3 | RPS9       | 21988832                                                                                                                           |
| P40763 | Q9ULD0 | STAT3 | OGDHL      | 21988832                                                                                                                           |
| P40763 | Q13569 | STAT3 | TDG        | 25814554                                                                                                                           |
| P40763 | Q8IZQ1 | STAT3 | WDFY3      | 25814554                                                                                                                           |
| P40763 | Q16665 | STAT3 | HIF1A      | 15735682;18985005;25402006                                                                                                         |
| P40763 | Q14469 | STAT3 | HES1       | 15156153                                                                                                                           |
| P40763 | Q13263 | STAT3 | TRIM28     | 18037959                                                                                                                           |
| P40763 | Q96ST3 | STAT3 | SIN3A      | 22783022                                                                                                                           |
| P40763 | Q04206 | STAT3 | RELA       | 12057007;14593105;19345327;23335796;25402006;doi:10.1007/978-3-<br>14704793;15223310;15653507;16007122;17676033;20686606;21325026  |
| P40763 | P40763 | STAT3 | STAT3      | ;21988832;23750211;25609649;7510216;9373245;9647732                                                                                |
| P40763 | P42684 | STAT3 | ABL2       | 25402006;25814554                                                                                                                  |

|        |        |       |           |                                                                                                                               |
|--------|--------|-------|-----------|-------------------------------------------------------------------------------------------------------------------------------|
| P40763 | Q9UBE8 | STAT3 | NLK       | 15764709;21836163;25402006                                                                                                    |
| P40763 | Q9UER7 | STAT3 | DAXX      | 16331268;25402006                                                                                                             |
| P40763 | Q05397 | STAT3 | PTK2      | 10925297;25241761;25402006;doi:10.1007/978-3-540-73060-6_4                                                                    |
| P40763 | Q14526 | STAT3 | HIC1      | 24067369;27085461                                                                                                             |
| P40763 | Q9BYH8 | STAT3 | NFKBIZ    | 19595668;21988832                                                                                                             |
| P40763 | Q9Y2X9 | STAT3 | ZNF281    | 25814554                                                                                                                      |
| P40763 | Q9NP31 | STAT3 | SH2D2A    | 25402006;25814554                                                                                                             |
| P40763 | Q9UIH9 | STAT3 | KLF15     | 25814554                                                                                                                      |
| P40763 | P45984 | STAT3 | MAPK9     | 20871632;25402006                                                                                                             |
| P40763 | Q8IUQ4 | STAT3 | SIAH1     | 21988832;27871173                                                                                                             |
| P40763 | P60409 | STAT3 | KRTAP10-7 | 25814554                                                                                                                      |
| P40763 | Q9NQA5 | STAT3 | TRPV5     | 26186194;28514442                                                                                                             |
| P40763 | Q99062 | STAT3 | CSF3R     | 21836163;25402006;9864141                                                                                                     |
| P40763 | Q9Y6X2 | STAT3 | PIAS3     | 11429412;12804609;18037959;20516148;21836163;21988832;25402006<br>;9388184;9724754;doi:10.1007/978-3-540-73060-6_4            |
| P40763 | P50750 | STAT3 | CDK9      | 15286705                                                                                                                      |
| P40763 | Q7L591 | STAT3 | DOK3      | 25814554                                                                                                                      |
| P40763 | Q09472 | STAT3 | EP300     | 10205054;11923478;15649887;15653507;15735682;18782771;21836163<br>;22116549;25402006;26504087;doi:10.1007/978-3-540-73060-6_4 |
| P40763 | P49137 | STAT3 | MAPKAPK2  | 25814554                                                                                                                      |
| P40763 | Q96DZ7 | STAT3 | TM4SF19   | 25814554                                                                                                                      |
| P40763 | Q6IA86 | STAT3 | ELP2      | 10954736;25402006                                                                                                             |
| P40763 | P51813 | STAT3 | BMX       | 10688651;21516116;25402006;25416956;25814554                                                                                  |
| P40763 | Q3KNS6 | STAT3 | ZNF829    | 25814554                                                                                                                      |
| P40763 | P52333 | STAT3 | JAK3      | 10037026;12207328;25402006;doi:10.1007/978-3-540-73060-6_4                                                                    |
| P40763 | P52294 | STAT3 | KPNA1     | 16298512;19084525;21836163;25402006                                                                                           |
| P40763 | Q9Y608 | STAT3 | LRRFIP2   | 25609649                                                                                                                      |
| P40763 | P47712 | STAT3 | PLA2G4A   | 23023127;25609649                                                                                                             |
| P40763 | Q9NPJ8 | STAT3 | NXT2      | 25814554                                                                                                                      |
| P40763 | Q92905 | STAT3 | COP55     | 21689417;23911788;25402006                                                                                                    |
| P40763 | Q96JC1 | STAT3 | VPS39     | 25814554                                                                                                                      |
| P40763 | P51617 | STAT3 | IRAK1     | 15465816;25402006                                                                                                             |
| P40763 | Q8WTS6 | STAT3 | SETD7     | 21098664;25402006                                                                                                             |
| P40763 | Q9UMR2 | STAT3 | DDX19B    | 26186194;28514442                                                                                                             |

|        |        |       |          |                                                                                                                                    |
|--------|--------|-------|----------|------------------------------------------------------------------------------------------------------------------------------------|
| P40763 | Q13547 | STAT3 | HDAC1    | 15653507;15870198;22116549;22750444;25402006                                                                                       |
| P40763 | Q8NEC7 | STAT3 | GSTCD    | 25814554                                                                                                                           |
| P40763 | Q8WVB6 | STAT3 | CHTF18   | 25814554                                                                                                                           |
| P40763 | Q9Y3P9 | STAT3 | RABGAP1  | 25814554                                                                                                                           |
| P40763 | Q07666 | STAT3 | KHDRBS1  | 11585385;25402006                                                                                                                  |
| P40763 | Q15642 | STAT3 | TRIP10   | 15163742                                                                                                                           |
| P40763 | P41218 | STAT3 | MNDA     | 25814554                                                                                                                           |
| P40763 | P63000 | STAT3 | RAC1     | 11021801;25402006;doi:10.1007/978-3-540-73060-6_4                                                                                  |
| P40763 | Q5TA89 | STAT3 | HES5     | 15156153;21836163                                                                                                                  |
| P40763 | Q15672 | STAT3 | TWIST1   | 25814554                                                                                                                           |
| P40763 | P68402 | STAT3 | PAFAH1B2 | 25814554                                                                                                                           |
| P40763 | Q14847 | STAT3 | LASP1    | 25814554                                                                                                                           |
| P40763 | Q8TE76 | STAT3 | MORC4    | 21988832                                                                                                                           |
| P40763 | Q9POJ0 | STAT3 | NDUFA13  | 12628925;12867595;25402006                                                                                                         |
| P40763 | Q15788 | STAT3 | NCOA1    | 11773079;17471507;25402006                                                                                                         |
| P40763 | P23458 | STAT3 | JAK1     | 10918587;11294897;11350938;11722592;11751884;11940572;12244095;<br>;12576423;12626508;14551213;15284024;25065853;25402006;8272872; |
| P40763 | P24385 | STAT3 | CCND1    | 11279133;15659654;20876300;21836163;25402006;doi:10.1007/978-3-                                                                    |
| P40763 | P19838 | STAT3 | NFKB1    | 12057007;25241761;25402006                                                                                                         |
| P40763 | P08069 | STAT3 | IGF1R    | 11463827;16382134;25241761;25402006                                                                                                |
| P40763 | P07949 | STAT3 | RET      | 11536047;12637586;15485908;25241761;25402006                                                                                       |
| P40763 | P18031 | STAT3 | PTPN1    | 11970898;15821101;25402006                                                                                                         |
| P40763 | P05412 | STAT3 | JUN      | 10490649;25402006;doi:10.1007/978-3-540-73060-6_4                                                                                  |
| P40763 | P06401 | STAT3 | PGR      | 20876300;21184768;25402006                                                                                                         |
| P40763 | P07948 | STAT3 | LYN      | 12244095;18070987;23023127;25402006;doi:10.1007/978-3-540-73060-                                                                   |
| P40763 | O60496 | STAT3 | DOK2     | 25402006;25814554                                                                                                                  |
| P40763 | P01106 | STAT3 | MYC      | 20686606;23750211;25402006                                                                                                         |
| P40763 | P30084 | STAT3 | ECHS1    | 23416296                                                                                                                           |
| P40763 | P15172 | STAT3 | MYOD1    | 12947115;25402006                                                                                                                  |
| P40763 | P15927 | STAT3 | RPA2     | 10875894;25402006;25416956                                                                                                         |
| P40763 | O43318 | STAT3 | MAP3K7   | 15764709;25402006;3031469                                                                                                          |
| P40763 | P26358 | STAT3 | DNMT1    | 15870198;25402006;25854163                                                                                                         |
| P40763 | O43283 | STAT3 | MAP3K13  | 21988832;25402006                                                                                                                  |
| P40763 | O15379 | STAT3 | HDAC3    | 15653507;18037959;22116549;25402006;25892518                                                                                       |

|        |        |       |        |                                                                  |
|--------|--------|-------|--------|------------------------------------------------------------------|
| P40763 | O00459 | STAT3 | PIK3R2 | 25402006;25814554                                                |
| P40763 | P27986 | STAT3 | PIK3R1 | 23023127;25402006;25814554                                       |
| P40763 | O95661 | STAT3 | DIRAS3 | 21643014;21836163                                                |
| P40763 | P35219 | STAT3 | CA8    | 25814554                                                         |
| P40763 | P22607 | STAT3 | FGFR3  | 10918587;11294897;11350938;11940572;12244095;12576423;12626508   |
| P40763 | P10275 | STAT3 | AR     | 11322786;11751884;12804609;25402006                              |
| P40763 | P08631 | STAT3 | HCK    | 10918587;11294897;11350938;11940572;12244095;12576423;12626508   |
| P40763 | P38936 | STAT3 | CDKN1A | ;14551213;21836163;25402006;8626374;doi:10.1007/978-3-540-73060- |
| P40763 | P16871 | STAT3 | IL7R   | 10764767;20686606;21184768;23750211;25241761;25402006            |
| P40763 | P16871 | STAT3 | IL7R   | 20167604;7719938                                                 |
| P40763 | P22455 | STAT3 | FGFR4  | 10918587;11294897;11350938;11940572;12244095;12576423;12626508   |
| P40763 | O60674 | STAT3 | JAK2   | 10918587;10925297;11294897;11350938;11940572;12244095;12576423   |
| P40763 | O43293 | STAT3 | DAPK3  | ;12626508;14551213;15156153;15284024;19834108;21836163;2302312   |
| P40763 | P00533 | STAT3 | EGFR   | 16219639;21836163;25402006                                       |
| P40763 | P00533 | STAT3 | EGFR   | 10358079;12873986;14963038;14966128;15284024;15485908;15657067   |
| P40763 | P22681 | STAT3 | CBL    | ;15950906;16273093;18258752;20145033;21573184;21836163;2395613   |
| P40763 | P22681 | STAT3 | CBL    | 25402006;25814554                                                |
| P40763 | P29590 | STAT3 | PML    | 12506013;25402006                                                |
| P40763 | O14874 | STAT3 | BCKDK  | 21988832                                                         |
| P40763 | P25791 | STAT3 | LMO2   | 25416956                                                         |
| P40763 | P06239 | STAT3 | LCK    | 10825200;18070987;25402006;25814554                              |
| P40763 | P16591 | STAT3 | FER    | 10878010;12738762;25402006                                       |
| P40763 | P17181 | STAT3 | IFNAR1 | 16082366;23023127;25402006;8626489;doi:10.1007/978-3-540-73060-  |
| P40763 | P27695 | STAT3 | APEX1  | 15735682;25402006                                                |
| P40763 | P07384 | STAT3 | CAPN1  | 21988832                                                         |
| P40763 | O15069 | STAT3 | NACAD  | 25814554                                                         |
| P40763 | P08047 | STAT3 | SP1    | 16931573;17471507;21184768;24396070;25402006                     |
| P40763 | O60341 | STAT3 | KDM1A  | 21098664;25402006                                                |
| P40763 | P04150 | STAT3 | NR3C1  | 14522952;25202013;25402006;26508788;9388192;doi:10.1007/978-3-   |
| P40763 | P12931 | STAT3 | SRC    | 10918587;11294897;11350938;11940572;12244095;12576423;12626508   |
| P40763 | O14512 | STAT3 | SOCS7  | ;14551213;15313931;15735682;18070987;19372587;21573184;2183616   |
| P40763 | P28482 | STAT3 | MAPK1  | 15677474;25402006                                                |
| P40763 | P28482 | STAT3 | MAPK1  | 10446219;10521505;11350938;12576423;12763138;14551213;15979846   |
| P40763 | P28482 | STAT3 | MAPK1  | ;21836163;25402006;9343414;9872331;doi:10.1007/978-3-540-73060-  |



|        |        |        |         |                                                                |
|--------|--------|--------|---------|----------------------------------------------------------------|
| P40763 | O75695 | STAT3  | RP2     | 26186194;28514442                                              |
| P40763 | P27361 | STAT3  | MAPK3   | 10446219;10521505;11350938;12576423;12763138;14551213;21836163 |
| P40763 | P18847 | STAT3  | ATF3    | 25096061;25402006;25814554                                     |
| P40763 | P14625 | STAT3  | HSP90B1 | 18662321                                                       |
| P40763 | P16234 | STAT3  | PDGFRA  | 23023127;25241761;9484840                                      |
| P40763 | P09619 | STAT3  | PDGFRB  | 23023127;25241761;25402006;9484840                             |
| P40763 | P30626 | STAT3  | SRI     | 18330356;21988832                                              |
| P40763 | P06454 | STAT3  | PTMA    | 15242774;25402006                                              |
| P40763 | P04626 | STAT3  | ERBB2   | 11940572;16273093;19372587;20876300;25402006                   |
| P40763 | O14503 | STAT3  | BHLHE40 | 15223310                                                       |
| P40763 | P22736 | STAT3  | NR4A1   | 21988832;25402006                                              |
| P40763 | P09769 | STAT3  | FGR     | 12244095;21988832;25402006;doi:10.1007/978-3-540-73060-6_4     |
| P40763 | P20160 | STAT3  | AZU1    | 26186194;28514442                                              |
| P40763 | P06400 | STAT3  | RB1     | 15677471;25402006                                              |
| P40763 | P31146 | STAT3  | CORO1A  | 21988832                                                       |
| P40763 | P16949 | STAT3  | STMN1   | 16401721;21836163;23333463                                     |
| Q14765 | Q99665 | STAT4  | IL12RB2 | 10415122;25402006;9890938                                      |
| Q14765 | Q14765 | STAT4  | STAT4   | 14704793;18591661                                              |
| Q14765 | P07550 | STAT4  | ADRB2   | 24561123                                                       |
| Q14765 | O14796 | STAT4  | SH2D1B  | 25814554                                                       |
| Q14765 | P46108 | STAT4  | CRK     | 25402006;25814554                                              |
| P42229 | Q15303 | STAT5A | ERBB4   | 15534001;16273093;16729043;21836163;22584572;25402006          |
| P42229 | Q8N0Z3 | STAT5A | SPICE1  | 26496610                                                       |
| P42229 | Q8TC21 | STAT5A | ZNF596  | 21988832                                                       |
| P42229 | P52333 | STAT5A | JAK3    | 10037026;18250158;23023127;25402006;9047382;doi:10.1007/978-3- |
| P42229 | Q99081 | STAT5A | TCF12   | 25416956                                                       |
| P42229 | Q99490 | STAT5A | AGAP2   | 20075866;25402006                                              |
| P42229 | Q8TAK6 | STAT5A | OLIG1   | 25814554                                                       |
| P42229 | Q09472 | STAT5A | EP300   | 14726487;21988832;25402006;26504087;9773981;9989503            |
| P42229 | P51692 | STAT5A | STAT5B  | 10358045;16082366;21836163;23023127;25402006;28514442;9398404; |
| P42229 | P46108 | STAT5A | CRK     | 11097834;21836163;25241761;25402006                            |
| P42229 | P46109 | STAT5A | CRKL    | 11167825;21836163;25402006;9657743;9837784;9872990             |
| P42229 | P43365 | STAT5A | MAGEA12 | 16189514                                                       |
| P42229 | Q9UEY8 | STAT5A | ADD3    | 26496610                                                       |

|        |        |        |         |                                                                   |
|--------|--------|--------|---------|-------------------------------------------------------------------|
| P42229 | Q9H0C8 | STAT5A | ILKAP   | 26496610                                                          |
| P42229 | Q06124 | STAT5A | PTPN11  | 10617656;12060651;12237455;25402006                               |
| P42229 | Q99988 | STAT5A | GDF15   | 26496610                                                          |
| P42229 | Q9NRG1 | STAT5A | PRTFDC1 | 16189514                                                          |
| P42229 | Q99873 | STAT5A | PRMT1   | 18413343                                                          |
| P42229 | Q06187 | STAT5A | BTK     | 11413148;23023127;25402006;7925280;8617237;doi:10.1007/978-3-540- |
| P42229 | Q9UMF0 | STAT5A | ICAM5   | 26496610                                                          |
| P42229 | Q13287 | STAT5A | NMI     | 16082366;25402006;9989503;doi:10.1007/978-3-540-73060-6_4         |
| P42229 | Q9Y2K5 | STAT5A | R3HDM2  | 26496610                                                          |
| P42229 | Q9UJU2 | STAT5A | LEF1    | 24394665;25402006                                                 |
| P42229 | Q86X55 | STAT5A | CARM1   | 18413343                                                          |
| P42229 | Q969D9 | STAT5A | TSLP    | 10570284;11418668                                                 |
| P42229 | Q9UGK3 | STAT5A | STAP2   | 15611091;25402006                                                 |
| P42229 | P42229 | STAT5A | STAT5A  | 14704793;21988832;9528750                                         |
| P42229 | Q7Z2K6 | STAT5A | ERMP1   | 26496610                                                          |
| P42229 | P45973 | STAT5A | CBX5    | 23733954                                                          |
| P42229 | O60674 | STAT5A | JAK2    | 11413148;21836163;23023127;25402006;7925280;8617237;9047382;95    |
| P42229 | P28482 | STAT5A | MAPK1   | 10194762;10996427;21836163;25241761;25402006                      |
| P42229 | P10912 | STAT5A | GHR     | 21836163;23023127;25241761;25402006;8702683                       |
| P42229 | O43567 | STAT5A | RNF13   | 26496610                                                          |
| P42229 | P08559 | STAT5A | PDHA1   | 26496610;28514442                                                 |
| P42229 | P22681 | STAT5A | CBL     | 12193575;23533197;25402006;25814554                               |
| P42229 | P09619 | STAT5A | PDGFRB  | 23023127;25241761;25402006;9484840                                |
| P42229 | P29353 | STAT5A | SHC1    | 10996427;21836163;23397142;25402006                               |
| P42229 | P03372 | STAT5A | ESR1    | 11682624;15304355;21836163;25402006                               |
| P42229 | P16410 | STAT5A | CTLA4   | 16476059;23023127;25241761                                        |
| P42229 | P00533 | STAT5A | EGFR    | 10358079;16273093;16729043;22729867;24135280;24658140;25402006    |
| P42229 | P10515 | STAT5A | DLAT    | 26496610                                                          |
| P42229 | P00367 | STAT5A | GLUD1   | 21988832                                                          |
| P42229 | P11177 | STAT5A | PDHB    | 26496610;28514442                                                 |
| P42229 | P38159 | STAT5A | RBMX    | 21988832                                                          |
| P42229 | O00330 | STAT5A | PDHX    | 26496610                                                          |
| P42229 | P18031 | STAT5A | PTPN1   | 12237455;25402006;doi:10.1007/978-3-540-73060-6_4                 |
| P42229 | O95363 | STAT5A | FARS2   | 26496610                                                          |

|        |        |        |        |                                                                   |
|--------|--------|--------|--------|-------------------------------------------------------------------|
| P42229 | P01589 | STAT5A | IL2RA  | 11485747                                                          |
| P42229 | P16871 | STAT5A | IL7R   | 20167604;23023127;25402006;7719938                                |
| P42229 | P19235 | STAT5A | EPOR   | 10374881;15644415;21836163;25402006;8977232;doi:10.1007/978-3-    |
| P42229 | P23458 | STAT5A | JAK1   | 11722592;25402006;9047382;doi:10.1007/978-3-540-73060-6_4         |
| P42229 | P14859 | STAT5A | POU2F1 | 14645506;25402006                                                 |
| P42229 | P37231 | STAT5A | PPARG  | 18927468;23223023                                                 |
| P51692 | P51692 | STAT5B | STAT5B | 12089361;14704793;20962278;22729867;9428692                       |
| P51692 | Q09472 | STAT5B | EP300  | 14726487;25402006;9989503;doi:10.1007/978-3-540-73060-6_4         |
| P51692 | Q9UGK3 | STAT5B | STAP2  | 15611091;25402006                                                 |
| P51692 | Q06124 | STAT5B | PTPN11 | 10617656;25402006                                                 |
| P51692 | Q9P2N6 | STAT5B | KANSL3 | 26496610                                                          |
| P51692 | Q9NVP2 | STAT5B | ASF1B  | 26496610                                                          |
| P51692 | Q6IA86 | STAT5B | ELP2   | 10954736;25402006                                                 |
| P51692 | Q13287 | STAT5B | NMI    | 16082366;25402006;9989503;doi:10.1007/978-3-540-73060-6_4         |
| P51692 | Q9H0K6 | STAT5B | PUS7L  | 26496610                                                          |
| P51692 | Q14764 | STAT5B | MVP    | 26496610                                                          |
| P51692 | P09622 | STAT5B | DLD    | 26496610                                                          |
| P51692 | P51681 | STAT5B | CCR5   | 11350939;21836163;25402006                                        |
| P51692 | P19320 | STAT5B | VCAM1  | 19738201;22623428;23023127                                        |
| P51692 | P46108 | STAT5B | CRK    | 10720694;11097834;21836163;25402006;9845531;doi:10.1007/978-3-    |
| P51692 | P19235 | STAT5B | EPOR   | 15644415;21836163;25402006;8977232;doi:10.1007/978-3-540-73060-   |
| P51692 | P10721 | STAT5B | KIT    | 10358045;17554063;25402006                                        |
| P51692 | P08559 | STAT5B | PDHA1  | 26496610                                                          |
| P51692 | P16410 | STAT5B | CTLA4  | 16476059;25241761                                                 |
| P51692 | P10912 | STAT5B | GHR    | 21836163;25241761;25402006;8923468                                |
| P51692 | P14859 | STAT5B | POU2F1 | 14645506;16025120;25402006                                        |
| P51692 | P04150 | STAT5B | NR3C1  | 11158330;21836163;25402006;8878484;9528750;doi:10.1007/978-3-540- |
| P51692 | P06213 | STAT5B | INSR   | 10830280;12456798;21836163;25402006;9122188;9428692               |
| P51692 | P18031 | STAT5B | PTPN1  | 12237455;25402006;doi:10.1007/978-3-540-73060-6_4                 |
| P51692 | P11177 | STAT5B | PDHB   | 26496610                                                          |
| P51692 | O00330 | STAT5B | PDHX   | 26496610                                                          |
| P51692 | P23458 | STAT5B | JAK1   | 25402006;9047382;doi:10.1007/978-3-540-73060-6_4                  |
| P51692 | P00533 | STAT5B | EGFR   | 10558875;11751923;12577067;16273093;16729043;22729867;25402006    |
| P51692 | P46109 | STAT5B | CRKL   | 10720694;11097834;21836163;25402006;9845531;9872990;doi:10.1007/  |

|        |        |        |         |                                                                                                         |
|--------|--------|--------|---------|---------------------------------------------------------------------------------------------------------|
| P51692 | P15822 | STAT5B | HIVEP1  | 26496610                                                                                                |
| P51692 | P40933 | STAT5B | IL15    | 21988832                                                                                                |
| P51692 | O60674 | STAT5B | JAK2    | 12538627;21836163;24354892;25402006;9047382;9575217;doi:10.1007/                                        |
| P51692 | P01589 | STAT5B | IL2RA   | 10602027;11485747;25402006                                                                              |
| P51692 | P10515 | STAT5B | DLAT    | 26496610                                                                                                |
| P42226 | Q460N5 | STAT6  | PARP14  | 16537510                                                                                                |
| P42226 | Q92793 | STAT6  | CREBBP  | 10454341;11574547;15695802;25402006                                                                     |
| P42226 | Q09472 | STAT6  | EP300   | 10454341;17237818;23461825;25402006;doi:10.1007/978-3-540-73060-                                        |
| P42226 | P42226 | STAT6  | STAT6   | 14704793;22000020;8085155                                                                               |
| P42226 | Q15788 | STAT6  | NCOA1   | 11574547;12138096;14757047;14993689;15695802;18267973;21836163;25402006;doi:10.1007/978-3-540-73060-6_4 |
| P42226 | P68104 | STAT6  | EEF1A1  | 21988832;26344197                                                                                       |
| P42226 | Q7KZF4 | STAT6  | SND1    | 12234934;20225206;25402006                                                                              |
| P42226 | Q9UHD2 | STAT6  | TBK1    | 22000020                                                                                                |
| P42226 | Q15306 | STAT6  | IRF4    | 10601358;11342629;25402006                                                                              |
| P42226 | Q99732 | STAT6  | LITAF   | 15793005;25402006                                                                                       |
| P42226 | Q9UBT6 | STAT6  | POLK    | 26496610                                                                                                |
| P42226 | Q14807 | STAT6  | KIF22   | 26496610                                                                                                |
| P42226 | Q86WV6 | STAT6  | TMEM173 | 22000020                                                                                                |
| P42226 | Q7Z434 | STAT6  | MAVS    | 22000020                                                                                                |
| P42226 | P52333 | STAT6  | JAK3    | 12207328;25402006;doi:10.1007/978-3-540-73060-6_4                                                       |
| P42226 | P52630 | STAT6  | STAT2   | 10490982;21268015;21836163;25402006;doi:10.1007/978-3-540-73060-                                        |
| P42226 | P23246 | STAT6  | SFPQ    | 21106524                                                                                                |
| P42226 | P23458 | STAT6  | JAK1    | 10856136;25402006;9651359                                                                               |
| P42226 | P17181 | STAT6  | IFNAR1  | 10490982;25402006                                                                                       |
| P42226 | P37231 | STAT6  | PPARG   | 21093321;25402006                                                                                       |
| P42226 | P17706 | STAT6  | PTPN2   | 17210636;25402006                                                                                       |
| P42226 | P07355 | STAT6  | ANXA2   | 20121258;25402006                                                                                       |
| P42226 | P19838 | STAT6  | NFKB1   | 25402006;9584180                                                                                        |
| P42226 | P24394 | STAT6  | IL4R    | 15661890;21268015;21836163;23023127;25402006;8816495;9392697;9                                          |
